# Supplementary material for: Importance of circadian timing for aging and longevity
Source: Nat Commun. 2021 May 17;12:2862. doi: 10.1038/s41467-021-22922-6 (PMC8129076; doi:10.1038/s41467-021-22922-6)
Supplement: Supplementary file 1 — Supplementary Information [file 41467_2021_22922_MOESM1_ESM.pdf]

|             |                       | Adrenal gland |    |    | Aorta |    |    | Brain |    |    | brain stem |    |    | BAT |    |    | Cerebellum |    |    | Distal Colon |    |    | Heart |    |    | Hypothalamus |    |    | Kidney |    |    | Liver |    |    | Lung |    |    | Muscle |    |    | Pituitary |    |    | SCN |    |    | Spleen |  |  | WAT |  |  |
|-------------|-----------------------|---------------|----|----|-------|----|----|-------|----|----|------------|----|----|-----|----|----|------------|----|----|--------------|----|----|-------|----|----|--------------|----|----|--------|----|----|-------|----|----|------|----|----|--------|----|----|-----------|----|----|-----|----|----|--------|--|--|-----|--|--|
| Common name | GeneID                | Mo            | Ba | Hu | Mo    | Ba | Hu | Mo    | Ba | Hu | Mo         | Ba | Hu | Mo  | Ba | Hu | Mo         | Ba | Hu | Mo           | Ba | Hu | Mo    | Ba | Hu | Mo           | Ba | Hu | Mo     | Ba | Hu | Mo    | Ba | Hu | Mo   | Ba | Hu | Mo     | Ba | Hu | Mo        | Ba | Hu | Mo  | Ba | Hu |        |  |  |     |  |  |
| GH          | Gh                    |               |    |    |       |    |    |       |    |    |            |    |    |     |    |    |            |    |    |              |    |    |       |    |    |              |    |    |        |    |    |       |    |    |      |    |    |        |    |    |           |    |    |     |    |    |        |  |  |     |  |  |
| IGF-1       | Igf1                  |               |    |    |       |    |    |       |    |    |            |    |    |     |    |    |            |    |    |              |    |    |       |    |    |              |    |    |        |    |    |       |    |    |      |    |    |        |    |    |           |    |    |     |    |    |        |  |  |     |  |  |
| PI3K        | Pi3kca                |               |    |    |       |    |    |       |    |    |            |    |    |     |    |    |            |    |    |              |    |    |       |    |    |              |    |    |        |    |    |       |    |    |      |    |    |        |    |    |           |    |    |     |    |    |        |  |  |     |  |  |
|             | Pi3kcb                |               |    |    |       |    |    |       |    |    |            |    |    |     |    |    |            |    |    |              |    |    |       |    |    |              |    |    |        |    |    |       |    |    |      |    |    |        |    |    |           |    |    |     |    |    |        |  |  |     |  |  |
|             | Pi3kcd                |               |    |    |       |    |    |       |    |    |            |    |    |     |    |    |            |    |    |              |    |    |       |    |    |              |    |    |        |    |    |       |    |    |      |    |    |        |    |    |           |    |    |     |    |    |        |  |  |     |  |  |
|             | Pi3kcg                |               |    |    |       |    |    |       |    |    |            |    |    |     |    |    |            |    |    |              |    |    |       |    |    |              |    |    |        |    |    |       |    |    |      |    |    |        |    |    |           |    |    |     |    |    |        |  |  |     |  |  |
| AKT         | Akt1                  |               |    |    |       |    |    |       |    |    |            |    |    |     |    |    |            |    |    |              |    |    |       |    |    |              |    |    |        |    |    |       |    |    |      |    |    |        |    |    |           |    |    |     |    |    |        |  |  |     |  |  |
|             | Akt2                  |               |    |    |       |    |    |       |    |    |            |    |    |     |    |    |            |    |    |              |    |    |       |    |    |              |    |    |        |    |    |       |    |    |      |    |    |        |    |    |           |    |    |     |    |    |        |  |  |     |  |  |
|             | Akt3                  |               |    |    |       |    |    |       |    |    |            |    |    |     |    |    |            |    |    |              |    |    |       |    |    |              |    |    |        |    |    |       |    |    |      |    |    |        |    |    |           |    |    |     |    |    |        |  |  |     |  |  |
| mTOR        | Mtor                  |               |    |    |       |    |    |       |    |    |            |    |    |     |    |    |            |    |    |              |    |    |       |    |    |              |    |    |        |    |    |       |    |    |      |    |    |        |    |    |           |    |    |     |    |    |        |  |  |     |  |  |
| RICTOR      | Rictor (TOR2 complex) |               |    |    |       |    |    |       |    |    |            |    |    |     |    |    |            |    |    |              |    |    |       |    |    |              |    |    |        |    |    |       |    |    |      |    |    |        |    |    |           |    |    |     |    |    |        |  |  |     |  |  |
| RPTOR       | Rpctor (TOR1 complex) |               |    |    |       |    |    |       |    |    |            |    |    |     |    |    |            |    |    |              |    |    |       |    |    |              |    |    |        |    |    |       |    |    |      |    |    |        |    |    |           |    |    |     |    |    |        |  |  |     |  |  |
| PTEN        | Pten                  |               |    |    |       |    |    |       |    |    |            |    |    |     |    |    |            |    |    |              |    |    |       |    |    |              |    |    |        |    |    |       |    |    |      |    |    |        |    |    |           |    |    |     |    |    |        |  |  |     |  |  |
| FOXO        | Foxo1                 |               |    |    |       |    |    |       |    |    |            |    |    |     |    |    |            |    |    |              |    |    |       |    |    |              |    |    |        |    |    |       |    |    |      |    |    |        |    |    |           |    |    |     |    |    |        |  |  |     |  |  |
|             | Foxo3                 |               |    |    |       |    |    |       |    |    |            |    |    |     |    |    |            |    |    |              |    |    |       |    |    |              |    |    |        |    |    |       |    |    |      |    |    |        |    |    |           |    |    |     |    |    |        |  |  |     |  |  |
|             | Foxo4                 |               |    |    |       |    |    |       |    |    |            |    |    |     |    |    |            |    |    |              |    |    |       |    |    |              |    |    |        |    |    |       |    |    |      |    |    |        |    |    |           |    |    |     |    |    |        |  |  |     |  |  |
|             | Foxo6                 |               |    |    |       |    |    |       |    |    |            |    |    |     |    |    |            |    |    |              |    |    |       |    |    |              |    |    |        |    |    |       |    |    |      |    |    |        |    |    |           |    |    |     |    |    |        |  |  |     |  |  |
| AMPK        | Prkaa1                |               |    |    |       |    |    |       |    |    |            |    |    |     |    |    |            |    |    |              |    |    |       |    |    |              |    |    |        |    |    |       |    |    |      |    |    |        |    |    |           |    |    |     |    |    |        |  |  |     |  |  |
|             | Prkaa2                |               |    |    |       |    |    |       |    |    |            |    |    |     |    |    |            |    |    |              |    |    |       |    |    |              |    |    |        |    |    |       |    |    |      |    |    |        |    |    |           |    |    |     |    |    |        |  |  |     |  |  |
| SIRT        | Sirt1                 |               |    |    |       |    |    |       |    |    |            |    |    |     |    |    |            |    |    |              |    |    |       |    |    |              |    |    |        |    |    |       |    |    |      |    |    |        |    |    |           |    |    |     |    |    |        |  |  |     |  |  |
|             | Sirt2                 |               |    |    |       |    |    |       |    |    |            |    |    |     |    |    |            |    |    |              |    |    |       |    |    |              |    |    |        |    |    |       |    |    |      |    |    |        |    |    |           |    |    |     |    |    |        |  |  |     |  |  |
|             | Sirt3                 |               |    |    |       |    |    |       |    |    |            |    |    |     |    |    |            |    |    |              |    |    |       |    |    |              |    |    |        |    |    |       |    |    |      |    |    |        |    |    |           |    |    |     |    |    |        |  |  |     |  |  |
|             | Sirt4                 |               |    |    |       |    |    |       |    |    |            |    |    |     |    |    |            |    |    |              |    |    |       |    |    |              |    |    |        |    |    |       |    |    |      |    |    |        |    |    |           |    |    |     |    |    |        |  |  |     |  |  |
|             | Sirt5                 |               |    |    |       |    |    |       |    |    |            |    |    |     |    |    |            |    |    |              |    |    |       |    |    |              |    |    |        |    |    |       |    |    |      |    |    |        |    |    |           |    |    |     |    |    |        |  |  |     |  |  |
|             | Sirt6                 |               |    |    |       |    |    |       |    |    |            |    |    |     |    |    |            |    |    |              |    |    |       |    |    |              |    |    |        |    |    |       |    |    |      |    |    |        |    |    |           |    |    |     |    |    |        |  |  |     |  |  |
|             | Sirt7                 |               |    |    |       |    |    |       |    |    |            |    |    |     |    |    |            |    |    |              |    |    |       |    |    |              |    |    |        |    |    |       |    |    |      |    |    |        |    |    |           |    |    |     |    |    |        |  |  |     |  |  |
| PGC-1a      | Ppargc1a              |               |    |    |       |    |    |       |    |    |            |    |    |     |    |    |            |    |    |              |    |    |       |    |    |              |    |    |        |    |    |       |    |    |      |    |    |        |    |    |           |    |    |     |    |    |        |  |  |     |  |  |
| FGF-1       | Fgf1                  |               |    |    |       |    |    |       |    |    |            |    |    |     |    |    |            |    |    |              |    |    |       |    |    |              |    |    |        |    |    |       |    |    |      |    |    |        |    |    |           |    |    |     |    |    |        |  |  |     |  |  |
| FGF-21      | Fgf21                 |               |    |    |       |    |    |       |    |    |            |    |    |     |    |    |            |    |    |              |    |    |       |    |    |              |    |    |        |    |    |       |    |    |      |    |    |        |    |    |           |    |    |     |    |    |        |  |  |     |  |  |
| PARP-1      | Parp1                 |               |    |    |       |    |    |       |    |    |            |    |    |     |    |    |            |    |    |              |    |    |       |    |    |              |    |    |        |    |    |       |    |    |      |    |    |        |    |    |           |    |    |     |    |    |        |  |  |     |  |  |

**Supplementary Table 1. Tissue-specific circadian oscillations of aging-related genes.** Nutrient-sensing genes associated with longevity, undergo circadian oscillations in several mammalian tissues; including mice, baboons and humans. Aging-related genes expressed in a circadian manner in mouse (purple), baboon (salmon) and human (green). Genes that are non-circadian in each tissue are represented in grey. White color indicates no data. RNA-seq and microarray containing circadian datasets for mouse and other tissues extracted from CircaDB (<http://circadb.hogeneschlab.org>, Hogenesch laboratory).

not cycling

circadian in Mouse

circadian in Baboons

circadian in Humans

no data available/reported

Definition of "circadian" expression when JTK-cycle (circadian algorithm) p-value <0.05

**References**

CircaDB: <http://circadb.hogeneschlab.org/>

Koike, N., *et al.* Transcriptional architecture and chromatin landscape of the core circadian clock in mammals. *Science* **338**, 349-354 (2012).

Zhang, R., Lahens, N.F., Ballance, H.J., Hughes, M.E. & Hogenesch, J.B. A circadian gene expression atlas in mammals: implications for biology and medicine. *Proc Natl Acad Sci U S A* **111**, 16219-16224 (2014).

Mure, L.S., *et al.* Diurnal transcriptome atlas of a primate across major neural and peripheral tissues. *Science* **359**, eaao0318 (2018).
